# Supplementary material for: Green access to chiral Vince lactam in a buffer-free aqueous system using a newly identified substrate-tolerant (−)-γ-lactamase
Source: Royal Society of Chemistry journal article supplement (doi:10.1039/c6cy00786d), 2016-01-01
Supplement: c6cy00786d1.pdf [file c6cy00786d1.pdf]

## Supplementary Materials

### Green access to chiral Vince lactam in a buffer-free aqueous system using a newly identified substrate-tolerant (-)- $\gamma$ -lactamase

Jin-Gang Yin, Yi Gong, Xiao-Yan Zhang, Gao-Wei Zheng\* and Jian-He Xu\*

*State Key Laboratory of Bioreactor Engineering, Shanghai Collaborative Innovation Center for Biomanufacturing, East China University of Science and Technology, 130 Meilong Road, Shanghai 200237, P.R. China. Fax: (+86)-21-6425-0840; E-mail: [gaoweizheng@ecust.edu.cn](mailto:gaoweizheng@ecust.edu.cn), [jianhexu@ecust.edu.cn](mailto:jianhexu@ecust.edu.cn)*

|                                                                                                                  |    |
|------------------------------------------------------------------------------------------------------------------|----|
| <b>Table S1</b> Active $\gamma$ -lactamase genes identified by genome mining and primers used in this study..... | S2 |
| <b>Fig. S1</b> Multiple sequences alignment of SvGL with some related enzymes.....                               | S3 |
| <b>Fig. S2</b> SDS-PAGE analysis of purified SvGL.....                                                           | S4 |
| <b>Fig. S3</b> (A) Effect of pH on SvGL activity. (B) Effect of temperature on SvGL activity. ....               | S5 |
| <b>Fig. S4</b> Chiral HPLC analysis of (+)- $\gamma$ -lactam synthesized by SvGL.....                            | S6 |
| <b>Fig. S5</b> <sup>1</sup> H NMR spectra of (+)- $\gamma$ -lactam synthesized by SvGL. ....                     | S7 |

**Table S1** Active  $\gamma$ -lactamase genes identified by genome mining and primers used in this study

| Enzyme        | Entry  | Organism                                | Primers                                                               |
|---------------|--------|-----------------------------------------|-----------------------------------------------------------------------|
| <i>Pp</i> GL  | Q88CC8 | <i>Pseudomonas putida</i>               | F: CGCGGATCCATGAGCACGTTTCGTTACC<br>R: CCCAAGCTTTTACCGCTGAAGGAACGC     |
| <i>Sv</i> GL  | D9XDN2 | <i>Streptomyces viridochromogenes</i>   | F: CGGAATTCATGCCGTACATCACCGTG<br>R: CCCAAGCTTTTCACTTCTCCAGGAAGGC      |
| <i>Gd</i> GL  | B5ZI99 | <i>Gluconacetobacter diazotrophicus</i> | F: CGCGGATCCATGTCCGATTTTACGACG<br>R: CCCAAGCTTTTCAAGTGTTCAGGAATTCC    |
| <i>Gt</i> GL  | H5UHP0 | <i>Gordonia terrae</i>                  | F: CGCGGATCCATGGGCTACATCAAAGTC<br>R: CCCAAGCTTTTCACTTCTGAACGAACCC     |
| <i>Se</i> GL  | K0K3C7 | <i>Saccharothrix espanaensis</i>        | F: CGCGGATCCATGCCGTACATCACCGTG<br>R: CCCAAGCTTTTCAAGTCCGCGAGGAAGCT    |
| <i>Cf</i> GL1 | F4GZY6 | <i>Cellulomonas fimi</i>                | F: CGCGGATCCATGCCGTACATCACGAGCA<br>R: CCCAAGCTTTTCAAGCGGAGAGGAAGTC    |
| <i>Ac</i> GL  | B8HFZ6 | <i>Arthrobacter chlorophenolicus</i>    | F: CGCGGATCCATGGCTTTTATCACCGTTG<br>R: CCCAAGCTTCTACTTGGCCAGGAAGCC     |
| <i>Ev</i> GL  | L0G171 | <i>Echinicola vietnamensis</i>          | F: CGCGGATCCATGCCATTTTTGATCAATG<br>R: CCGCTCGAGTTATTTTTTTCAGAAAATCCAG |
| <i>Bm</i> GL  | D5DK94 | <i>Bacillus megaterium</i>              | F: CGCGGATCCATGGCAAAAATTAATGTAGG<br>R: CCCAAGCTTTTATGCTCTTAAAAATGACAG |
| <i>Mp</i> GL  | F5XPN5 | <i>Microthricum phosphovorus</i>        | F: CGCGGATCCATGCCCTTTCATCACCGTC<br>R: CCCAAGCTTTTCAACTCGCCAAGAAGCC    |
| <i>Cf</i> GL2 | F4H619 | <i>Cellulomonas fimi</i>                | F: CGCGGATCCATGGGAACGATCACGACCA<br>R: CCCAAGCTTTTCAAGGAGCGGAGGAAGTC   |

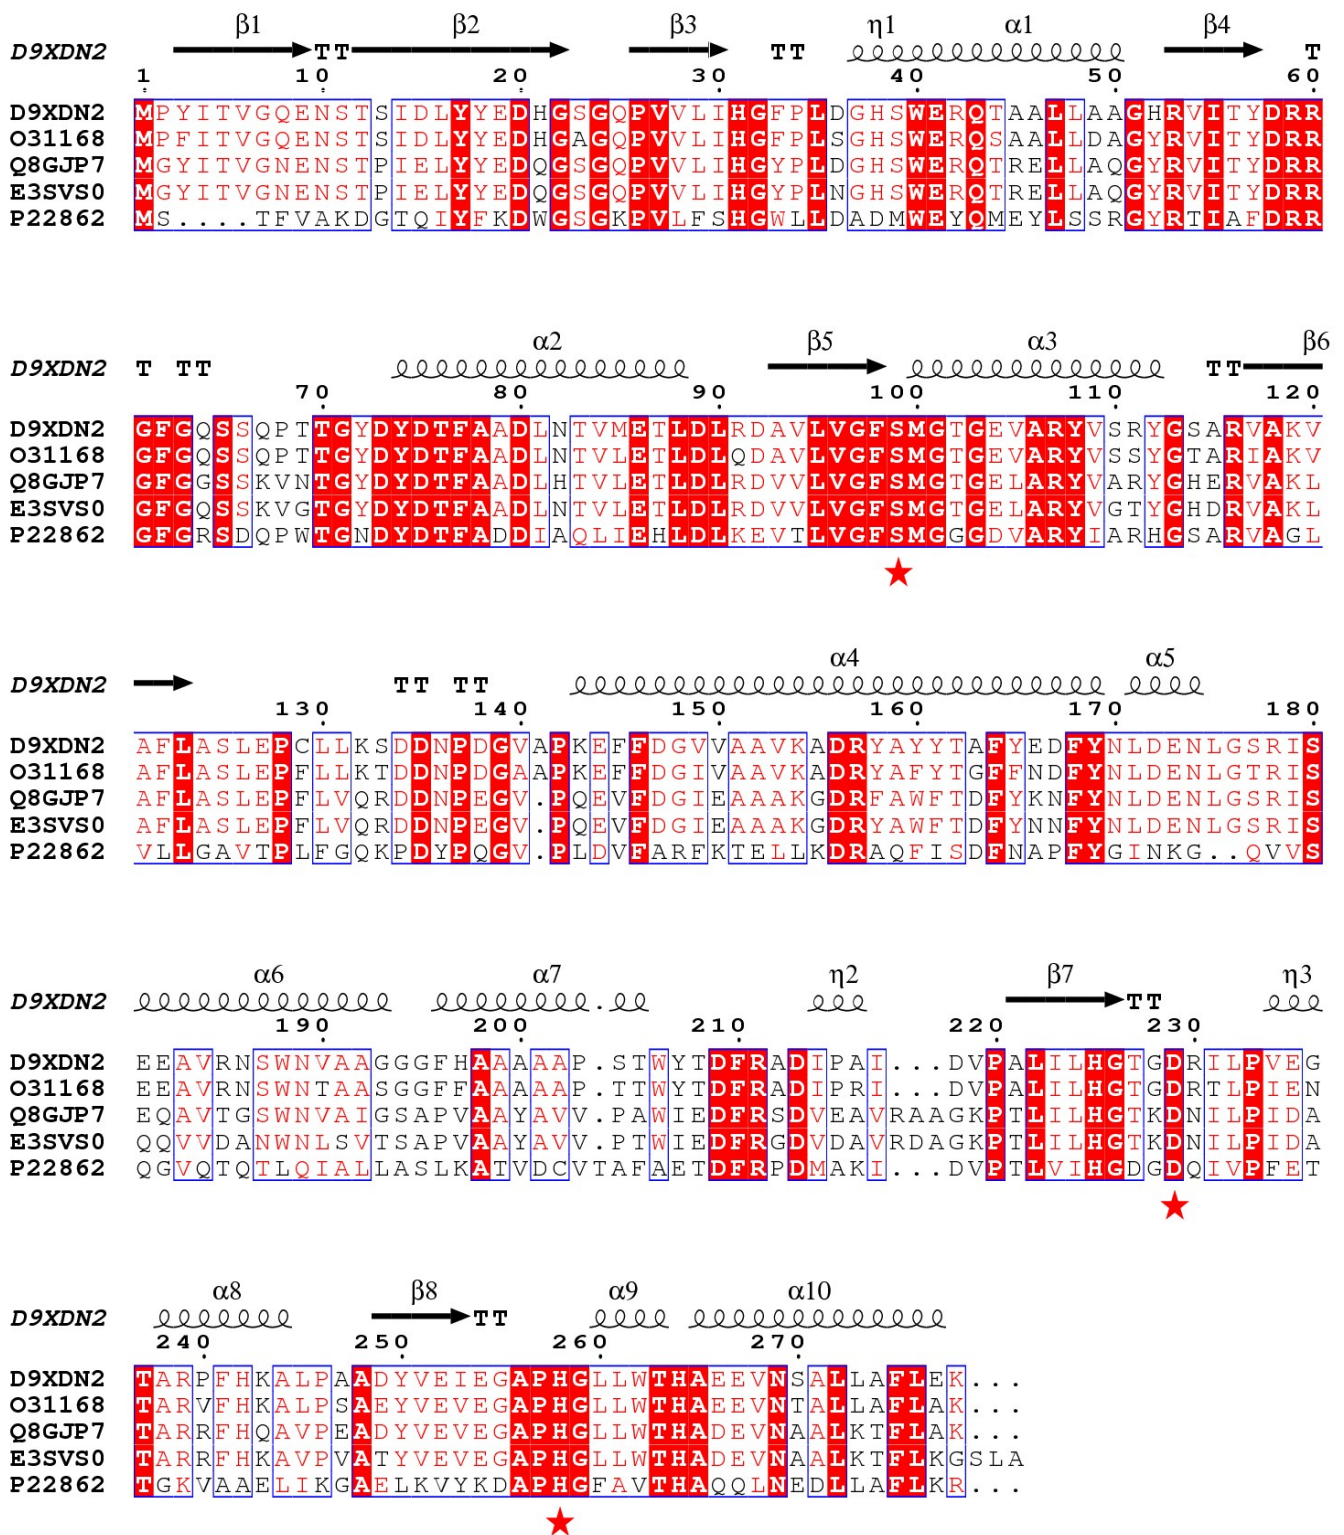

**Fig. S1** Multiple sequences alignment of SvGL with some related enzymes. SvGL from *Streptomyces viridochromogenes* (D9XDN2), non-heme chloroperoxidase from *Streptomyces aureofaciens* (O31168), (-)- $\gamma$ -lactamase from *Aureobacterium* sp. (Q8GJP7), (-)- $\gamma$ -lactamase from *Microbacterium hydrocarbonoxydans* (E3SVS0), and arylesterase from *Pseudomonas fluorescens* (P22862). The catalytic triad is indicated by the symbol (★).

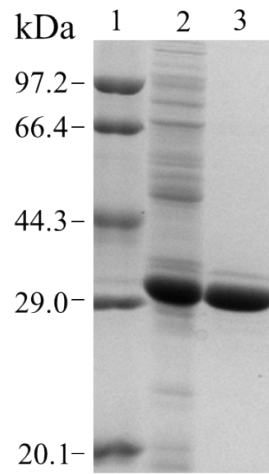

**Fig. S2** SDS-PAGE analysis of purified *SvGL*. Lane 1, protein markers; Lane 2, crude cell-free extract; Lane 3, purified enzyme.

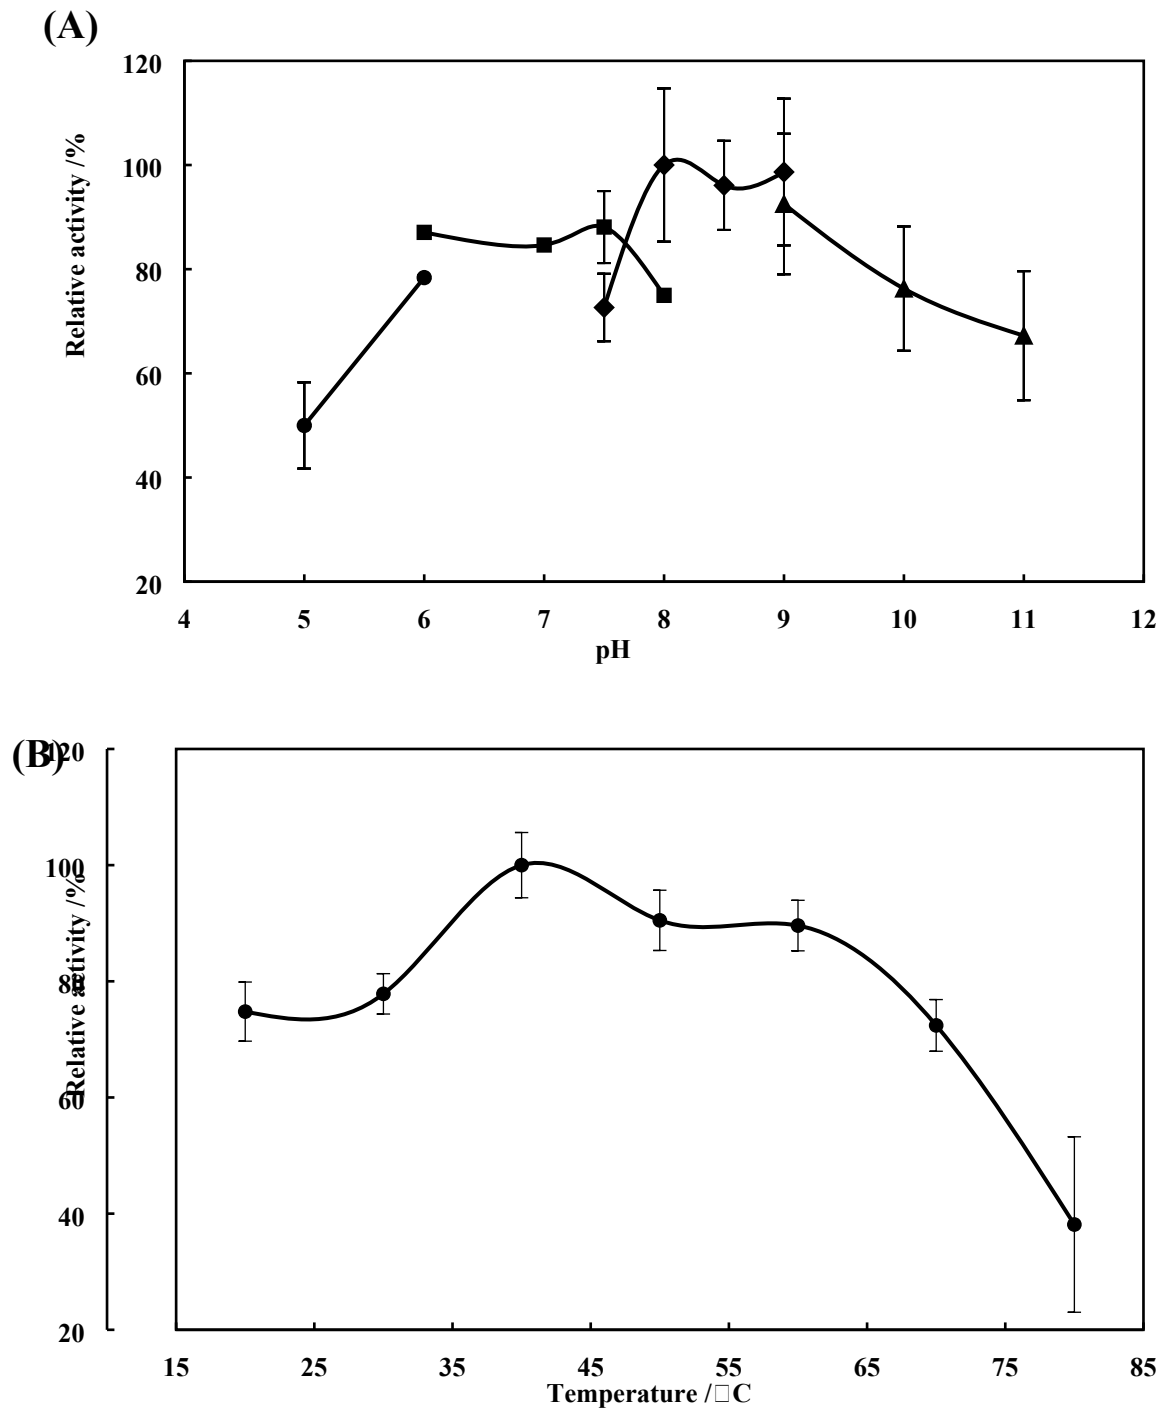

**Fig. S3** (A) Effect of pH on SvGL activity. Enzyme assay was performed in different buffers (100 mM) within a pH range of 6.0–10.0 (sodium citrate buffer, 5.0–6.0 (○); potassium phosphate, 6.0–8.0 (●); Tris-HCl, 7.5–9.0 (◆); Gly-NaOH, 9.0–11.0 (▲)) at 30°C. (B) Effect of temperature on SvGL activity. Relative activity was expressed as a percentage of the maximum activity under the experimental conditions.

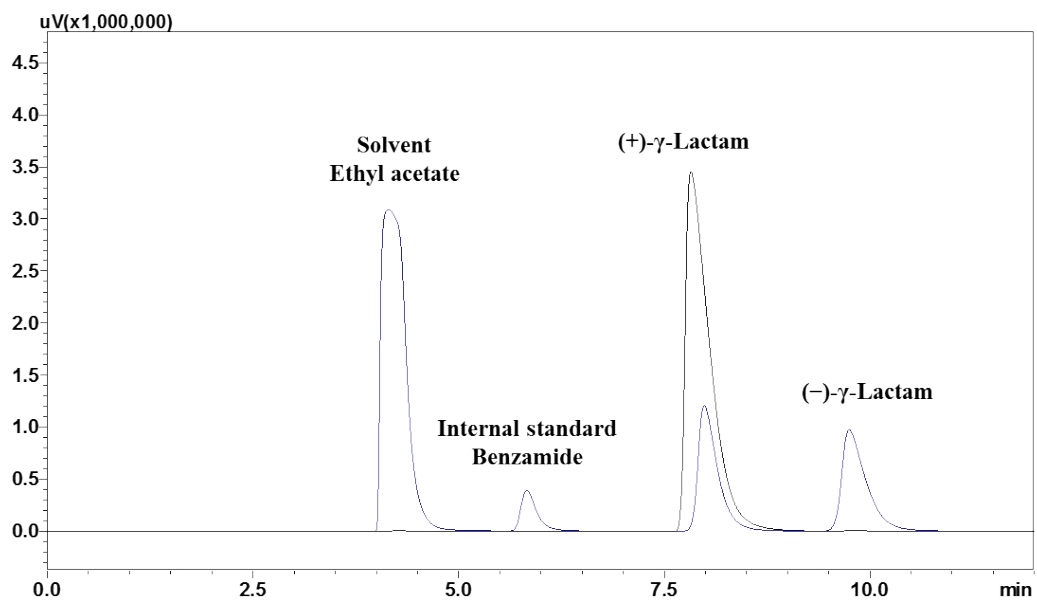

**Fig. S4** Chiral HPLC analysis of (+)- $\gamma$ -lactam synthesized by SvGL. Blue line: Standard *rac*- $\gamma$ -lactam, black line: The recovered (+)- $\gamma$ -lactam product synthesized by SvGL.

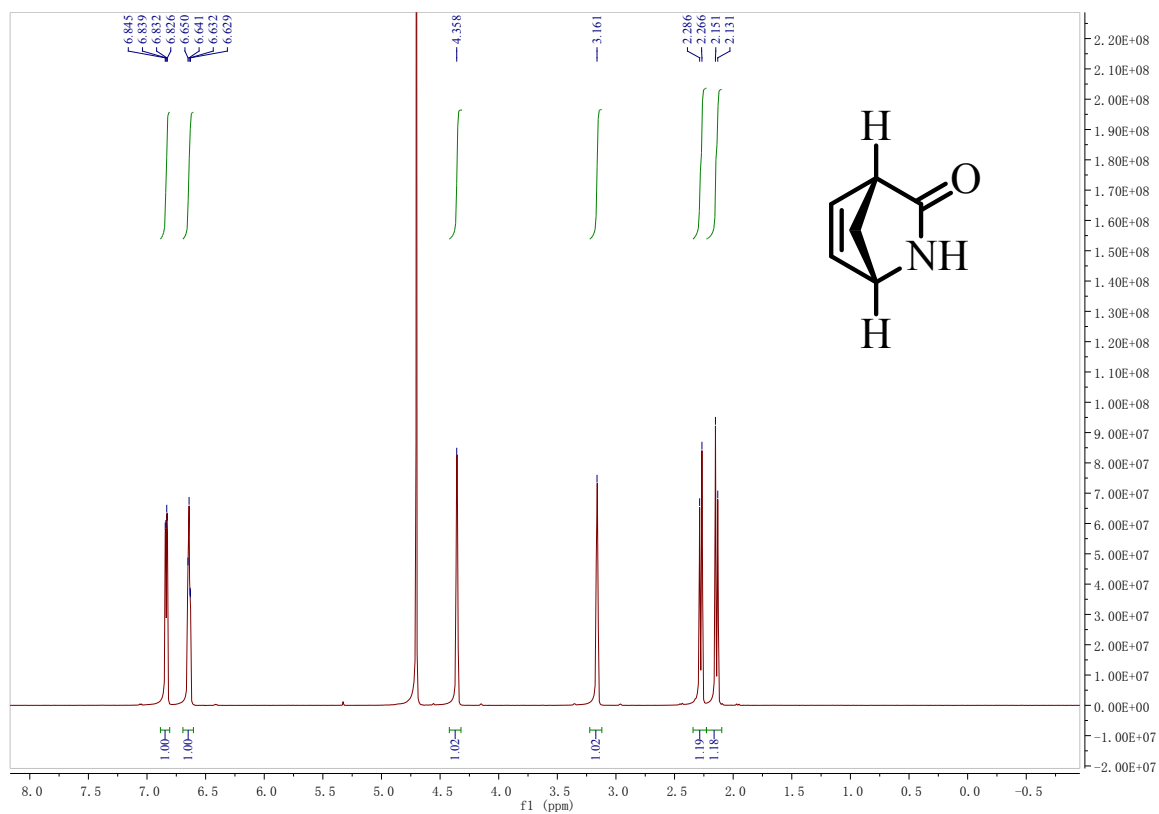

**Fig. S5**  $^1\text{H}$  NMR spectra of (+)- $\gamma$ -lactam synthesized by SvGL.

$^1\text{H}$  NMR (400 MHz,  $\text{D}_2\text{O}$ ):  $\delta = 2.14$  (1H, d,  $J = 8$  Hz,  $-\text{CHH}-$ ),  $\delta = 2.28$  (1H, d,  $J = 8$  Hz,  $-\text{CHH}-$ ),  $\delta = 3.16$  (1H, s,  $-\text{COCHCH}=\text{}$ ),  $\delta = 4.36$  (1H, s,  $-\text{NHCHCH}=\text{}$ ),  $\delta = 6.60\text{--}6.69$  (1H, m,  $-\text{CH}=\text{CH}-$ ),  $\delta = 6.83$  (1H, dd,  $J_1 = 5.2$  Hz,  $J_2 = 2.4$  Hz,  $-\text{CH}=\text{CH}-$ ).
